# Supplementary material for: Reducing the socioeconomic gradient in uptake of the NHS bowel cancer screening Programme using a simplified supplementary information leaflet: a cluster-randomised trial
Source: Springer Nature journal article supplement (doi:10.1186/s12885-017-3512-1), 2017-08-14

Supplementary Figure 2

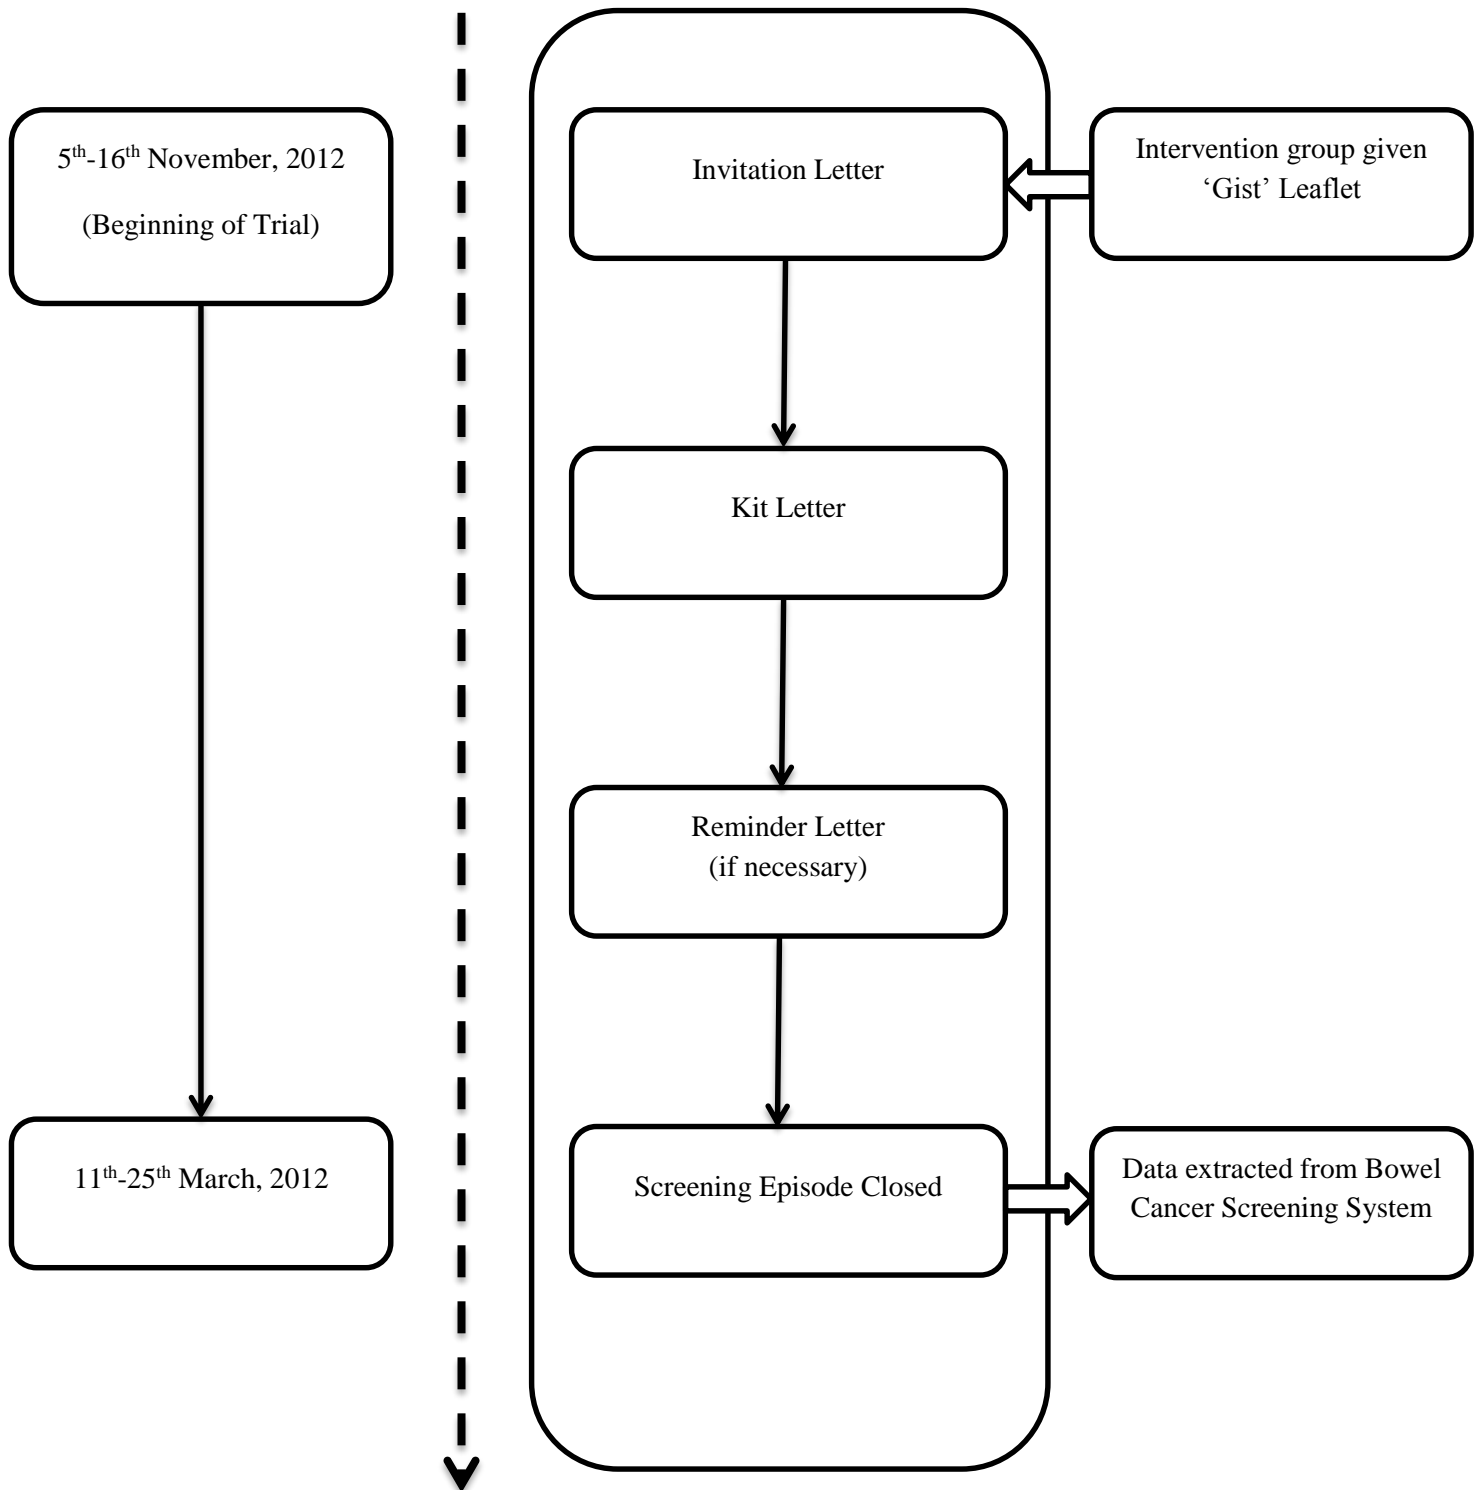

Supplement: MOESM2 [file 14215136]
